1                    **DeepKhib: a deep-learning framework for lysine**  
2                    **2-hydroxyisobutyrylation sites prediction**

3    Luna Zhang<sup>1</sup>, Yang Zou<sup>2, #</sup>, Ningning He<sup>2</sup>, Yu Chen<sup>1</sup>, Zhen Chen<sup>3, 4, \*</sup> and Lei Li<sup>1, 2, \*</sup>  
4

5    <sup>1</sup>School of Data Science and Software Engineering, Qingdao University, Qingdao  
6    266021, China

7    <sup>2</sup>School of Basic Medicine, Qingdao University, Qingdao 266021, China

8    <sup>3</sup>Collaborative Innovation Center of Henan Grain Crops, Henan Agricultural  
9    University, Zhengzhou 450046, China

10   <sup>4</sup>Key Laboratory of Rice Biology in Henan Province, Henan Agricultural University,  
11   Zhengzhou 450046, China

12

13   # These authors contributed equally to this work.

14   \* Correspondence:

15   Corresponding Authors

16   chenzhen-win2009@163.com; leili@reqdu.edu.cn

17

18

19   **Keywords:** Post-translational modification; lysine 2-Hydroxyisobutyrylation; deep  
20   learning; modification site prediction; machine learning.

21

## 22 **Abstract**

23 As a novel type of post-translational modification, lysine 2-Hydroxyisobutyrylation  
24 ( $K_{hib}$ ) plays an important role in gene transcription and signal transduction. In order to  
25 understand its regulatory mechanism, the essential step is the recognition of  $K_{hib}$  sites.  
26 Thousands of  $K_{hib}$  sites have been experimentally verified across five different species.  
27 However, there are only a couple traditional machine-learning algorithms developed  
28 to predict  $K_{hib}$  sites for limited species, lacking a general prediction algorithm. We  
29 constructed a deep-learning algorithm based on convolutional neural network with the  
30 one-hot encoding approach, dubbed CNN<sub>OH</sub>. It performs favorably to the traditional  
31 machine-learning models and other deep-learning models across different species, in  
32 terms of cross-validation and independent test. The area under the ROC curve (AUC)  
33 values for CNN<sub>OH</sub> ranged from 0.82 to 0.87 for different organisms, which is superior  
34 to the currently-available  $K_{hib}$  predictors. Moreover, we developed the general model  
35 based on the integrated data from multiple species and it showed great universality  
36 and effectiveness with the AUC values in the range of 0.79 to 0.87. Accordingly, we  
37 constructed the on-line prediction tool dubbed DeepKhib for easily identifying  $K_{hib}$   
38 sites, which includes both species-specific and general models. DeepKhib is available  
39 at <http://www.bioinfogo.org/DeepKhib>.

40

41

## 42 **1 Introduction**

43 Protein post-translational modification (PTM) is a key mechanism to regulate cellular  
44 functions through covalent modification and enzyme modification, which  
45 dynamically regulates a variety of biological events [1, 2]. Recently, an evolutionarily  
46 conserved short-chain lysine acylation modification dubbed lysine  
47 2-hydroxyisobutylation ( $K_{hib}$ ) has been reported, which introduces a steric bulk with a  
48 mass shift of +86.03Da (Fig. S1A) and neutralize the positive charge of lysine [3, 4].  
49 It involves various biological functions including biosynthesis of amino acids, starch  
50 biosynthesis, carbon metabolism, glycolysis / gluconeogenesis and transcription [3,  
51 5-11]. For instance, the decrease of this modification on K281 of glycolytic enzyme  
52 ENO1 reduces its catalytic acitivity [12]. The three-dimension structure of the  
53 peptide containing K281 in the center was shown as Fig. S1B.

54 Thousands of  $K_{hib}$  sites have been identified in different species including humans,  
55 plants and prokaryotes through large-scale experimental approaches [3, 5], which is  
56 summarized in Table S1. The experimental methods, however, are time-consuming  
57 and expensive and thus the development of prediction algorithms in silico is necessary  
58 for the high-throughput recognition of  $K_{hib}$  sites. Two classifiers (ie. iLys-Khib and  
59 Khibpred) have been reported for predicting the  $K_{hib}$  sites in a few species [13, 14].  
60 As many different organisms have been investigated and the number of  $K_{hib}$  sites has  
61 increased, it is indispensable to compare the characteristics of this modification in  
62 different species and investigate whether it is suitable to develop a general model with  
63 high confidence. Additionally, the reported models were based on traditional  
64 machine-learning (ML) algorithms (e.g. Random Forest (RF)). Recently, the deep  
65 learning (DL) algorithms, as the modern ML architecture, have demonstrated superior  
66 prediction performance in the field of bioinformatics, such as the prediction of  
67 modification sites on DNA, RNA and proteins [15-19]. We have developed a few DL  
68 approaches for the prediction of PTM sites and they all demonstrate their superiority  
69 over conventional ML algorithms [20-22]. Therefore, we attempted to compare the  
70 DL models with the traditional ML models for the prediction of  $K_{hib}$  sites.

71 In this study, we constructed a convolutional neural network (CNN)-based  
72 architecture with one-hot encoding approach, named as CNN<sub>OH</sub>. This model  
73 performed favorably to the traditional ML models and other DL models across  
74 different species, in terms of cross-validation and independent test. It is also superior  
75 to the documented K<sub>hib</sub> predictors. Furthermore, we constructed a general model  
76 based on the integrated data from multiple species and it demonstrated great  
77 generality and effectiveness. Finally, we shared both species-specific models and the  
78 general model as the on-line prediction tool DeepKhib for easily identifying K<sub>hib</sub> sites.

## 79 **2 Materials and Methods**

### 80 **2.1 Dataset collection**

81 The experimentally identified K<sub>hib</sub> sites from five different organisms including *Homo*  
82 *sapiens* (human), *Oryza sativa* (rice), *Physcomitrella patens* (moss) and two  
83 one-celled eukaryotes *Toxoplasma gondii* and *Saccharomyces cerevisiae*. The data of  
84 the species were pre-processed and the related procedure was exemplified using the  
85 human data, as listed below (Fig. S2).

86 We collected 12,166 K<sub>hib</sub> sites from 3,055 human proteins [5, 6]. These proteins  
87 were classified into 2,466 clusters using CD-HIT with the threshold of 40% according  
88 to the previous studies [23, 24]. In each cluster, the protein with the most K<sub>hib</sub> sites  
89 was selected as the representative of the cluster. On the 2,466 representatives, 9,473  
90 K<sub>hib</sub> sites were considered positives whereas the remaining K sites were taken as  
91 negatives. We further estimated the potential redundancy of the positive sites by  
92 extracting the peptide segment of seven residues with the K<sub>hib</sub> site in the center and  
93 count the number of unique segments [20, 25]. The number (9,444) of the unique  
94 segments is 99.7% of the total segments, suggesting considerable diversity of the  
95 positive segments. The number of the negative sites (103,987) is 11 times larger than  
96 that of the positive sites. To avoid the potential impact of biased data on model  
97 construction, we referred to previous studies and balanced positives and negatives by  
98 randomly selecting the same number of negative sites [16, 19]. These positives and

99 negatives composed the whole human dataset.

100 To determine the optimal sequence window for model construction, we tested  
101 different sequence window sizes ranging from 21 to 41, referring to the previous PTM  
102 studies where the optimal window sizes are between 31 to 39 [12][17, 20]. The  
103 window size of 37 corresponded to the largest area under the ROC curve (AUC)  
104 through ten-fold cross-validation (Fig. S3) and was therefore selected in this study. It  
105 should be noted that if the central lysine residue is located near the N-terminus or  
106 C-terminus of the protein sequence, the symbol "X" is added at the related terminus to  
107 ensure the same window size of the sequences.

108 Fig. 1 showed the flowcharts for all the species. The dataset of each species was  
109 randomly separated into five groups of which four were used for ten-fold  
110 cross-validation and the rest for independent test. Each group contained the same  
111 number of positives and negatives. Specifically, the cross-validation datasets included  
112 15,156/15,464/10,204/12,354 samples for *H. sapiens*/*T. gondii*/*O. sativa*/*P. patens*,  
113 respectively. Accordingly, the independent test sets  
114 comprised 3,790/3,866/2,552/3,090 samples for these organisms, separately. These  
115 datasets are available at <http://www.bioinfo.org/DeepKhib>.

## 116 2.2 Feature encodings

### 117 2.2.1 The ZSCALE encoding

118 Each amino acid is characterized by five physiochemical descriptor variables [26, 27].

### 119 2.2.2 The encoding of extended amino acid composition (EAAC) encoding

120 The EAAC encoding is based on the calculation of the amino acid composition (AAC)  
121 that indicates the amino acid frequencies for every position in the sequence window.  
122 EAAC is calculated by continuously sliding using a fixed-length sequence window  
123 (the default is 5) from the N-terminus to the C-terminus of each peptide [28]. The  
124 related formula is listed below:

$$125 \quad f(t, win) = \frac{N(t, win)}{N(win)}, t \in \{A, C, D, \dots, Y\}, win \in \{window1, window2, \dots, window37\}$$

126 (1)

127 where  $N(t, win)$  is the number of amino acid  $t$  in the sliding window  $win$ , and  $N(win)$

128 is the size of the sliding window  $win$ .

### 129 2.2.3 The enhanced grouped amino acids content (EGAAC) encoding

130 The EGAAC feature [22] is developed based on the grouped amino acids content

131 (GAAC) feature [28, 29]. In the GAAC feature, the 20 amino acid types are

132 categorized into five groups (g1: GAVLMI, g2: FYW, g3: KRH, g4: DE and g5:

133 STCPNQ) according to their physicochemical properties and the frequencies of the

134 groups are calculated for every position in the sequence window. For the EGAAC

135 feature, the GAAC values are calculated in the window of fixed length (the default as

136 5) continuously sliding from the N- to C-terminal of each peptide sequence.

### 137 2.2.4 The One-hot encoding

138 The one-hot encoding is represented by the conversion of the 20 types of amino acids

139 to 20 binary bits. By considering the complemented symbol "X", a vector of size

140 (20+1) bits is used to represent a single position in the peptide sequence. For example,

141 the amino acid "A" is represented by "10000000000000000000", "Y" is represented

142 by "000000000000000000010", and the symbol "X" is represented by

143 "000000000000000000001".

## 144 2.3 Architecture of the machine-learning models

### 145 2.3.1 The CNN model with one-hot encoding

146 The CNN algorithm [30] decomposes an overall pattern into many sub-patterns

147 (features) through a neurocognitive machine, and then enters the hierarchically

148 connected feature plane for processing. The architecture of the CNN model with

149 one-hot encoding (called as CNN<sub>OH</sub>) contained four layers as follows (Fig. 2A).

150 (i) The first layer was the input layer where peptide sequences were represented using  
151 the one-hot encoding approach.

152 (ii) The second layer was the convolution layer that consisted of four convolution  
153 sublayers and two max pooling sublayers. The convolution sublayers, each sublayer  
154 uses 128 convolution filters, the length of which are 1, 3, 9 and 10 respectively. The  
155 two max pooling sublayers followed the third and fourth convolution sublayers,  
156 individually.

157 (iii) The third layer contained the fully connected sublayer, which contained a fully  
158 connected sublayer with eight neuron units without flattening, and a global average  
159 pooling sublayer, which was adopted to correlate the feature mapping with category  
160 output in order to reduce training parameters and avoid over-fitting.

161 (iv) The last layer was the output layer that included a single unit outputting the  
162 probability score of the modification, calculated using the "Sigmoid" function. If the  
163 probability score is greater than a specified threshold (e.g. 0.5), the peptide is  
164 predicted to be positive.

165 The "ReLU" function [31] was used as the activation function of the convolution  
166 sublayers and fully connected sublayers of the above layers to avoid gradient  
167 dispersion in the training process. The Adam optimizer [32] was used to optimize the  
168 hyper-parameters of this model, which include batch size, maximum epoch, learning  
169 rate and dropout rate. The maximum training period was set as 1000 epochs to ensure  
170 the convergence of the loss function values. In each epoch, the training data set was  
171 separated and iterated in a batch size of 1024. To avoid over-fitting, the dropout of  
172 neurons units in each convolution sublayer of the second layer was set 70% and that  
173 in the full connection sublayer of the third layer was set 30% [33], the early stop  
174 strategy was adopted and the best model was saved.

### 175 2.3.2 *The CNN algorithm with word embedding*

176 The CNN algorithm with word embedding (CNN<sub>WE</sub>) contained five layers (Fig. 2B).

177 The input layer receives the sequence of window size 37 and each residue is

178 transformed into a five-dimensional word vector in the embedding layer. The rest  
179 layers are the same as the corresponding layers in CNN<sub>OH</sub>.

### 180 2.3.3 *The GRU algorithm with word embedding*

181 The GRU algorithm [34] includes an update gate and a reset gate. The former is used  
182 to control the extent to which the state information at the previous moment is brought  
183 into the current state, whereas the latter is used to control the extent to which the state  
184 information at the previous moment is ignored. The GRU algorithm with word  
185 embedding (GRU<sub>WE</sub>) contained five layers (Fig. 2C). The first, the second and the last  
186 layers are the same as the corresponding layers in CNN<sub>WE</sub>. The third layer is the  
187 recurrent layer where each word vector from the previous layer was sequentially  
188 inputted into the related GRU unit that contains 32 hidden neuron units. The fourth  
189 layer was the fully connected layer that contains 128 neuron units with "ReLU" as the  
190 activation function.

### 191 2.3.4 *The RF algorithms with different features*

192 The Random Forest algorithm [35] contains multiple decision trees, which remain  
193 unchanged under the scaling of feature values and various other transformations, and  
194 the output category is determined by the mode of the category output by the  
195 individual tree. The RF algorithm integrates multiple decision trees and chooses the  
196 classification with the most votes from the trees. Each tree depends on the values of a  
197 random vector sampled independently with the same distribution for all trees in the  
198 forest. The number of decision trees was set 140. This classifier was developed based  
199 on the Python module "sklearn".

## 200 **2.4 Cross-validation and Performance evaluation**

201 To evaluate the performance of K<sub>hib</sub> sites prediction, we adopted four statistical  
202 measurement methods. They included sensitivity (Sn), specificity (Sp), accuracy  
203 (ACC), and Matthew's correlation coefficient (MCC), listed as follows:



204 
$$Sn = \frac{TP}{TP+FN} \quad (2)$$

205 
$$Sp = \frac{TN}{TN+FP} \quad (3)$$

206 
$$Acc = \frac{TP+TN}{TP+FP+TN+FN} \quad (4)$$

207 
$$MCC = \frac{TP \times TN - TN \times FP}{\sqrt{(TP+FN) \times (TN+FP) \times (TP+FP) \times (TN+FN)}} \quad (5)$$

208 In the above equations, TP is true positives, FP is false positives, TN is true negatives,  
209 FN is false negatives. In addition, the area under the receiver operating characteristic  
210 (ROC) curve (AUC) values was calculated to evaluate the performance of the  
211 prediction model.

## 212 **2.5 Statistical methods**

213 The paired student's t-test was used to test the significant difference between the  
214 mean values of the two paired populations. As for multiple comparisons, the adjusted  
215 P value with the Benjamini-Hochberg (BH) method was adopted.

216

## 217 **3 Results and discussion**

218 A couple of computational approaches has been developed for the prediction of  $K_{hib}$   
219 sites [13, 14]. Recently, this modification has been investigated across five different  
220 species, ranging from single-celled organisms to multiple-celled organisms and from  
221 plants to mammals. Additionally, the number of reported sites has been significantly  
222 increased. These raised our interest to develop novel prediction algorithms and  
223 explore the characteristics of this modification. We pre-processed the data from  
224 different species and separated them into the cross-validation dataset and the  
225 independent test set (see Methods for detail; Fig. 1). We first took the human data as  
226 the representative to compare different models and then applied the model with the  
227 best performance to other species. The human cross-validation dataset contained  
228 15,156 samples and the independent test set covered 3,790 samples, in each of which  
229 half were positives and half were negatives.

### 230 **3.1 CNN<sub>OH</sub> showed superior performance**

231 We constructed nine models, divided into two categories: six traditional ML models  
232 and three DL models (See Methods for details). The traditional ML models were  
233 based on the RF algorithm combined with different encoding schemes. The DL  
234 models included a Gated Recurrent Unit (GRU) model with the word-embedding  
235 encoding approach dubbed GRU<sub>WE</sub> and two CNN models with the one-hot and  
236 word-embedding encoding approaches named CNN<sub>OH</sub> and CNN<sub>WE</sub>, respectively. Both  
237 encoding methods are common in the DL algorithms [20, 25].

238 The RF-based models were developed with different common encoding schemes,  
239 including EAAC, EGAAC and ZSCALE. Among these encoding schemes, EGAAC  
240 had the best performance followed by EAAC whereas ZSCALE was the worst in  
241 terms of AUC and ACC for both ten-fold cross-validation and the independent test  
242 (Table 1, Fig. 3). For instance, EGAAC corresponded to the average AUC value as  
243 0.775, EAAC had the value as 0.763 and ZSCALE had the value as 0.740 for cross  
244 validation. Because different encodings represent distinct characteristics of

245  $K_{hib}$ -containing peptides, we evaluated the combinations of the encoding schemes.  
246 The combinations showed better performances than individual scheme and the  
247 combination of all the three was the best for both cross-validation and the independent  
248 test, in terms of AUC, MCC and ACC (Table 1, Fig. 3). Therefore, the  $K_{hib}$  prediction  
249 accuracy could be improved by the integration of different encoding schemes.

250 As the DL algorithms showed superior to the traditional ML algorithms for a few  
251 PTM predictions in our previous studies [21, 22], we examined the DL algorithms for  
252 the  $K_{hib}$  prediction. Traditionally, CNN is popular for image prediction with spatial  
253 invariant features while RNN is ideal for text prediction with sequence features.  
254 However, many cases demonstrate that CNN also has good performance when applied  
255 to sequence data [16, 36]. Accordingly, we developed both RNN and CNN models for  
256 the  $K_{hib}$  prediction with two common encoding approaches: one-hot and  
257 word-embedding. Expectedly, all three DL models were significantly better than the  
258 traditional ML models constructed above in the cross-validation and independent test  
259 (Table 1, Fig. 3). For instance, the average AUC values of the DL models were above  
260 0.824 whereas those of the ML models were less than 0.802.

261 In these DL models, two CNN models  $CNN_{OH}$  and  $CNN_{WE}$  had similar  
262 performances and both compared favorably to  $GRU_{WE}$  (Table 1, Fig. 3).  $CNN_{OH}$  had  
263 the AUC value as 0.868 for the cross-validation and its values of SN, SP, ACC and  
264 MCC were 0.876, 0.700, 0.788 and 0.586, respectively. Here, we chose  $CNN_{OH}$  as the  
265 2-Hydroxyisobutyrylation predictor. We evaluated the robustness of our models by  
266 comparing their performances between the cross-validation and independent tests. As  
267 their performances between these two tests had no statistically different ( $P>0.01$ ), we  
268 concluded that our constructed models were robust and neither over-fitting nor  
269 under-fitting.

### 270 **3.2 Construction and comparison of predictors for other species**

271 We constructed nine models for the human organism and chose  $CNN_{OH}$  as the final  
272 prediction model. We applied the  $CNN_{OH}$  architecture to the other three organisms (i.e.

273 *T. gondii*, *O. sativa* and *P. patens*). For each organism, we separated the dataset as the  
274 cross-validation set and the independent set. Similar to the human species, the CNN<sub>OH</sub>  
275 models for these species had similar performances between cross-validation and  
276 independent test and their AUC values were larger than 0.818 (Table 2). It indicates  
277 that these constructed models are effective and robust.

278 As lysine 2-Hydroxyisobutyrylation is conserved across different types of species,  
279 we hypothesized that the model built for one species may be used to predict K<sub>hib</sub> sites  
280 for other species. To test this hypothesis, we compared the performances of the  
281 CNN<sub>OH</sub> models in terms of the independent data sets of individual species.  
282 Additionally, we built a general CNN<sub>OH</sub> model based on the training datasets  
283 integrated from all the four species. Table 3 shows that the AUC values of these  
284 predictions were larger than 0.761, suggesting that the cross-species prediction had  
285 reliable performances. Specifically, given a species, the best prediction performances  
286 were derived from the general model and the model developed specifically for this  
287 species. For instance, the human CNN<sub>OH</sub> model had the best performance followed by  
288 the general model in terms of the human independent test whereas the general model  
289 had the best accuracy followed by the moss-specific model for the moss independent  
290 test. These suggest that on one hand, lysine 2-Hydroxyisobutyrylation of each species  
291 has its own characteristics; one the other hand, this modifications across different  
292 species share strong commonalities. Therefore, the general model may be effectually  
293 applied to any species. Furthermore, we evaluated the generality of the general  
294 CNN<sub>OH</sub> model using the dataset of *S. cerevisiae* that contained 1,049 positive and  
295 1,049 negative samples, which may not be enough for build an effective DL predictor  
296 [20]. The general model got the AUC value as 0.789, indicating the generality of this  
297 model. In other words, the general model is effective to predict K<sub>hib</sub> sites for any  
298 organism.

299 We identified and compared the significant patterns and conserved motifs  
300 between K<sub>hib</sub> and non-K<sub>hib</sub> sequences across the different organisms using the  
301 two-sample-logo program with t-test (P<0.05) with Bonferroni correction[37]. Fig. 4  
302 shows the similarities and differences between the species. For instance, the residues

303 R and K at the -1 position (i.e. R&K@P-1) and P at +1 position (i.e. P@P+1) are  
304 significantly depleted across the species. On the contrary, K&R@P+1 tend to be  
305 enriched for *H. sapiens* but depleted for *T. gondii* whereas both species have the  
306 depleted residue Serine across the positions ranging from P-18 to P+18. These  
307 similarities between the organisms may result in the generality and effectiveness of  
308 the general CNN<sub>OH</sub> model.

### 309 **3.3 Comparison of CNN<sub>OH</sub> with the reported predictors**

310 We assessed the performance of CNN<sub>OH</sub> by comparing it with the existing K<sub>hib</sub>  
311 predictors KhibPred[14] and iLys-Khib[13]. First, we compared CNN<sub>OH</sub> with  
312 KhibPred for individual species in terms of ten-fold cross-validation[14]. The average  
313 AUC values of CNN<sub>OH</sub> were 0.868/0.830/0.823 for *H. sapiens*/*P. patens*/*O. sativa*,  
314 respectively (Table 2). On the contrary, the corresponding values of KhibPred were  
315 0.831/0.781/0.825[14]. Thus, CNN<sub>OH</sub> compares favorably to KhibPred. Second, the  
316 model iLys-Khib was constructed and tested using 9,318 human samples as the  
317 ten-fold cross-validation data set and 4,219 human samples as the independent test set.  
318 We used the same datasets to construct CNN<sub>OH</sub> and compared it with iLys-Khib.  
319 CNN<sub>OH</sub> outperformed iLys-Khib in terms of all the measurements of performance (e.g.  
320 Sn, Sp, Acc, MCC and AUC) for both ten-fold cross-validation and independent test  
321 (Table 4). For instance, the AUC value of CNN<sub>OH</sub> was 0.860 for the independent test  
322 whereas that of iLys-Khib was 0.756. In summary, CNN<sub>OH</sub> is a competitive predictor.

### 323 **3.4 Construction of the on-line K<sub>hib</sub> predictor**

324 We developed an easy-to-use Web tool for the prediction of K<sub>hib</sub> sites, dubbed as  
325 DeepKhib. It contains five CNN<sub>OH</sub> models, including one general model and four  
326 models specific to the species (i.e. *H. sapiens*, *O. sativa*, *P. patens* and *T. gondii*).  
327 Given a species of interest, users could select the suitable model (e.g. the general  
328 model or the model specific to an organism) for prediction (Fig. 5A). After the protein  
329 sequences as the fasta file format are uploaded, the prediction results will be shown

330 with five columns: Protein, Position, Sequence, Prediction score and Prediction  
331 category (Fig. 5B). The prediction category covered four types according to the  
332 prediction scores: no (0-0.320), medium confidence (0.320-0.441), high confidence  
333 (0.441-0.643) and very high confidence (0.643-1).

## 334 **4 Conclusions**

335 The common PTM classifiers are mainly based on the traditional ML algorithms that  
336 require the pre-defined informative features. Here, we applied the advanced DL  
337 algorithm CNN<sub>OH</sub> for predicting K<sub>hib</sub> sites. CNN<sub>OH</sub> shows its superior performance,  
338 because of the capability of the multi-layer CNN algorithm to extract complex  
339 features and learn sparse representation in a self-taught manner. Moreover, the general  
340 CNN<sub>OH</sub> model demonstrates great generality and effectiveness, due to the  
341 conservation of K<sub>hib</sub> modification from single-cell to multiple-cell organisms. The  
342 outstanding performance of DL in the prediction of K<sub>hib</sub> sites suggests that DL may be  
343 applied broadly to predicting other types of modification sites.

## 344 **Conflict of Interest**

345 The authors have declared that no competing interest exists.

## 346 **Authors' contributions**

347 LL conceived this project. LZ and YZ constructed the algorithms under the  
348 supervision of LL and ZC; LZ and NH analyzed the data. LL, YZ, YC and LZ wrote  
349 the manuscript. All authors read and approved the final manuscript.

## 350 **Acknowledgments**

351 This work was supported in part by funds from the Young Scientists Fund of the  
352 National Natural Science Foundation of China (Grant No. 31701142 to ZC), and the

353 National Natural Science Foundation of China (Grant No. 31770821 to LL); LL is  
354 supported by the “Distinguished Expert of Overseas Tai Shan Scholar” program. YZ  
355 is supported by the Qingdao Applied Research Project.

356

357

## 358 References

- 359 1. Beltrao, P., et al., *Evolution and functional cross-talk of protein*  
360 *post-translational modifications*. Mol Syst Biol, 2013. **9**: p. 714.
- 361 2. Skelly, M.J., L. Frungillo, and S.H. Spoel, *Transcriptional regulation by complex*  
362 *interplay between post-translational modifications*. Current Opinion in Plant  
363 Biology, 2016. **33**: p. 126-132.
- 364 3. Dai, L., et al., *Lysine 2-hydroxyisobutyrylation is a widely distributed active*  
365 *histone mark*. Nature Chemical Biology, 2014. **10**(5): p. 365-70.
- 366 4. Xiao, H., et al., *Genetic Incorporation of epsilon-N-2-Hydroxyisobutyryl-lysine*  
367 *into Recombinant Histones*. ACS Chem Biol, 2015. **10**(7): p. 1599-603.
- 368 5. Huang, H., et al., *Landscape of the regulatory elements for lysine*  
369 *2-hydroxyisobutyrylation pathway*. Cell Res, 2018. **28**(1): p. 111-125.
- 370 6. Wu, Q., et al., *Global Analysis of Lysine 2-Hydroxyisobutyrylome upon SAHA*  
371 *Treatment and Its Relationship with Acetylation and Crotonylation*. J  
372 Proteome Res, 2018. **17**(9): p. 3176-3183.
- 373 7. Huang, J., et al., *2-hydroxyisobutyrylation on histone h4k8 is regulated by*  
374 *glucose homeostasis in saccharomyces cerevisiae*. Proceedings of the National  
375 Academy of Sciences, 2017. **114**(33).
- 376 8. Yu, Z., et al., *Proteome-wide identification of lysine 2-hydroxyisobutyrylation*  
377 *reveals conserved and novel histone modifications in Physcomitrella patens*.  
378 Sci Rep, 2017. **7**(1): p. 15553.
- 379 9. Meng, X., et al., *Proteome-wide Analysis of Lysine 2-hydroxyisobutyrylation in*  
380 *Developing Rice (Oryza sativa) Seeds*. Sci Rep, 2017. **7**(1): p. 17486.
- 381 10. Yin, D., et al., *Global Lysine Crotonylation and 2- Hydroxyisobutyrylation in*  
382 *Phenotypically Different Toxoplasma gondii Parasites*. Molecular & Cellular  
383 Proteomics, 2019.
- 384 11. Li, Q.Q., et al., *Proteomic analysis of proteome and histone post-translational*  
385 *modifications in heat shock protein 90 inhibition-mediated bladder cancer*  
386 *therapeutics*. Sci Rep, 2017. **7**(1): p. 201.
- 387 12. Huang, H., et al., *p300-Mediated Lysine 2-Hydroxyisobutyrylation Regulates*  
388 *Glycolysis*. Mol Cell, 2018. **70**(4): p. 663-678 e6.
- 389 13. Ju, Z. and S.-Y. Wang, *iLys-Khib: Identify lysine 2-Hydroxyisobutyrylation sites*  
390 *using mRMR feature selection and fuzzy SVM algorithm*. Chemometrics and  
391 Intelligent Laboratory Systems, 2019. **191**: p. 96-102.
- 392 14. Wang. YG, et al., *Accurate prediction of species-specific*  
393 *2-hydroxyisobutyrylation sites based on machine learning frameworks*.  
394 Analytical biochemistry, 2020. **602**: p. 113793.
- 395 15. Tian, Q., et al., *MRCNN: a deep learning model for regression of genome-wide*  
396 *DNA methylation*. BMC Genomics, 2019. **20**(Suppl 2): p. 192.
- 397 16. Tahir, M., H. Tayara, and K.T. Chong, *iPseU-CNN: Identifying RNA*  
398 *Pseudouridine Sites Using Convolutional Neural Networks*. Mol Ther Nucleic  
399 Acids, 2019. **16**: p. 463-470.



- 400 17. Wang, D., et al., *Musitedeep: a deep-learning framework for general and*  
401 *kinase-specific phosphorylation site prediction*. *Bioinformatics*, 2017. **10**.
- 402 18. Long, H., et al., *A Hybrid Deep Learning Model for Predicting Protein*  
403 *Hydroxylation Sites*. *Int J Mol Sci*, 2018. **19**(9).
- 404 19. Huang, Y., et al., *BERMP: a cross-species classifier for predicting mA sites by*  
405 *integrating a deep learning algorithm and a random forest approach*.  
406 *International journal of biological sciences*, 2018. **14**(12): p. 1669-1677.
- 407 20. Chen, Z., et al., *Integration of A Deep Learning Classifier with A Random*  
408 *Forest Approach for Predicting Malonylation Sites*. *Genomics Proteomics*  
409 *Bioinformatics*, 2018. **16**(6): p. 451-459.
- 410 21. Chen, Z., et al., *Large-scale comparative assessment of computational*  
411 *predictors for lysine post-translational modification sites*. *Briefings in*  
412 *bioinformatics*, 2019. **20**(6): p. 2267-2290.
- 413 22. Zhao, Y., et al., *Identification of Protein Lysine Crotonylation Sites by a Deep*  
414 *Learning Framework With Convolutional Neural Networks*. *IEEE Access*, 2020.  
415 **8**: p. 14244-14252.
- 416 23. Huang, Y., et al., *CD-HIT Suite: a web server for clustering and comparing*  
417 *biological sequences*. *Bioinformatics*, 2010. **26**(5): p. 680-2.
- 418 24. Li, W. and A. Godzik, *Cd-hit: a fast program for clustering and comparing large*  
419 *sets of protein or nucleotide sequences*. *Bioinformatics*, 2006. **22**(13): p.  
420 1658-9.
- 421 25. Xie, Y., et al., *DeepNitro: Prediction of Protein Nitration and Nitrosylation Sites*  
422 *by Deep Learning*. *Genomics Proteomics Bioinformatics*, 2018. **16**(4): p.  
423 294-306.
- 424 26. Sandberg, M., L. Eriksson, and J. Jonsson, *New chemical descriptors relevant*  
425 *for the design of biologically active peptides. a multivariate characterization*  
426 *of 87 amino acids*. *Journal of Medicinal Chemistry*, 1998. **41**(14): p.  
427 2481-2491.
- 428 27. Chen, Y.Z., et al., *Sumohydro: a novel method for the prediction of*  
429 *sumoylation sites based on hydrophobic properties*. *PLoS ONE*, 2012. **7**(6).
- 430 28. Chen, Z., et al., *iFeature: a python package and web server for features*  
431 *extraction and selection from protein and peptide sequences*. *Bioinformatics*,  
432 2018.
- 433 29. Chen, Z., et al., *iLearn: an integrated platform and meta-learner for feature*  
434 *engineering, machine-learning analysis and modeling of DNA, RNA and*  
435 *protein sequence data*. *Briefings in bioinformatics*, 2020. **21**(3): p. 1047-1057.
- 436 30. Fukushima, K., *Neocognitron: a self organizing neural network model for a*  
437 *mechanism of pattern recognition unaffected by shift in position*. *Biol Cybern*,  
438 1980. **36**(4): p. 193-202.
- 439 31. Hahnloser, R.H., et al., *Digital selection and analogue amplification coexist in*  
440 *a cortex-inspired silicon circuit*. *Nature*, 2000. **405**(6789): p. 947-51.
- 441 32. Kingma, D.P. and B. J., *Adam: A Method for Stochastic Optimization*. *Computer*  
442 *Science*, 2014.

- 443 33. Nitish, S., et al., *Dropout: a simple way to prevent neural networks from*  
444 *overfitting*. 2014. **15**: p. 1929-1958.
- 445 34. Cho, K., et al., *Learning Phrase Representations using RNN Encoder-Decoder*  
446 *for Statistical Machine Translation*. Computer Ence, 2014.
- 447 35. Breiman, L., *Random Forests*. Machine Learning, 2001. **45**(1): p. 5-32.
- 448 36. Sainath, T.N., et al., *Deep convolutional neural networks for LVCSR*. IEEE  
449 International Conference on Acoustic, 2013.
- 450 37. Vacic. V, Iakoucheva. LM, and Radivojac. P, *Two Sample Logo: a graphical*  
451 *representation of the differences between two sets of sequence alignments*.  
452 Bioinformatics (Oxford, England), 2006. **22**(12): p. 1536-7.
- 453
- 454

455 **Table 1.** Performances comparison of the different classifiers for human  $K_{hib}$   
 456 prediction.

|                                 | Classifier                      | Sn                  | Sp          | Acc         | MCC         | AUC         |
|---------------------------------|---------------------------------|---------------------|-------------|-------------|-------------|-------------|
| Ten-fold                        | RF <sub>EGAAC</sub>             | 0.727±0.015         | 0.682±0.017 | 0.704±0.011 | 0.409±0.022 | 0.775±0.011 |
|                                 | RF <sub>EAAC</sub>              | 0.744±0.025         | 0.645±0.023 | 0.695±0.010 | 0.391±0.020 | 0.763±0.008 |
| cross-validation                | RF <sub>ZSCALE</sub>            | 0.681±0.016         | 0.662±0.018 | 0.672±0.011 | 0.344±0.023 | 0.740±0.014 |
|                                 | RF <sub>EGAAC+EAAC</sub>        | 0.748±0.019         | 0.691±0.023 | 0.719±0.012 | 0.439±0.025 | 0.789±0.011 |
|                                 | RF <sub>EGAAC+ZSCALE</sub>      | 0.726±0.019         | 0.707±0.015 | 0.716±0.012 | 0.433±0.025 | 0.794±0.010 |
|                                 | RF <sub>EGAAC+EAAC+ZSCALE</sub> | 0.751±0.016         | 0.702±0.022 | 0.727±0.013 | 0.454±0.026 | 0.802±0.010 |
|                                 | GRU <sub>WE</sub>               | 0.821±0.024         | 0.683±0.033 | 0.752±0.009 | 0.509±0.018 | 0.830±0.007 |
|                                 | CNN <sub>WE</sub>               | 0.849±0.035         | 0.722±0.042 | 0.786±0.007 | 0.578±0.012 | 0.867±0.005 |
|                                 | CNN <sub>OH</sub>               | 0.876±0.025         | 0.700±0.026 | 0.788±0.007 | 0.586±0.014 | 0.868±0.004 |
|                                 | Independent test                | RF <sub>EGAAC</sub> | 0.719±0.006 | 0.676±0.007 | 0.698±0.002 | 0.395±0.004 |
| RF <sub>EAAC</sub>              |                                 | 0.755±0.003         | 0.638±0.007 | 0.697±0.003 | 0.396±0.006 | 0.764±0.003 |
| RF <sub>ZSCALE</sub>            |                                 | 0.680±0.008         | 0.658±0.009 | 0.669±0.005 | 0.337±0.011 | 0.736±0.003 |
| RF <sub>EGAAC+EAAC</sub>        |                                 | 0.740±0.006         | 0.678±0.005 | 0.709±0.002 | 0.419±0.005 | 0.781±0.002 |
| RF <sub>EGAAC+ZSCALE</sub>      |                                 | 0.728±0.006         | 0.692±0.006 | 0.710±0.002 | 0.420±0.005 | 0.787±0.002 |
| RF <sub>EGAAC+EAAC+ZSCALE</sub> |                                 | 0.752±0.005         | 0.693±0.004 | 0.723±0.002 | 0.446±0.005 | 0.796±0.002 |
| GRU <sub>WE</sub>               |                                 | 0.806±0.015         | 0.692±0.029 | 0.749±0.004 | 0.501±0.007 | 0.824±0.005 |
| CNN <sub>WE</sub>               |                                 | 0.846±0.035         | 0.719±0.042 | 0.783±0.006 | 0.572±0.009 | 0.865±0.004 |
| CNN <sub>OH</sub>               |                                 | 0.874±0.026         | 0.690±0.035 | 0.782±0.005 | 0.575±0.005 | 0.871±0.001 |

457 Note: The data sets for ten-fold cross-validation and an independent test were described in the Methods. The RF classifier with  
 458 the different encoding approach was named as RF<sub>EGAAC</sub>, RF<sub>EAAC</sub>, RF<sub>ZSCALE</sub>, RF<sub>EGAAC+EAAC</sub>, RF<sub>EGAAC+ZSCALE</sub> and  
 459 RF<sub>EGAAC+EAAC+ZSCALE</sub>. The RNN/CNN classifier with the word embedding encoding approach was named as GRU<sub>WE</sub> /CNN<sub>WE</sub>,  
 460 respectively. The CNN classifier with one-hot encoding was named as CNN<sub>OH</sub>. Ten models were constructed in the ten-fold cross  
 461 validation and evaluated using the ten different validation datasets and the same independent dataset. Accordingly, the value Sn,  
 462 Sp, Acc, MCC and AUC were represented by average ±standard deviation.

463 **Table 2.** The AUC values of the CNN<sub>OH</sub> model constructed for *O. sativa*, *P. patens*, *T.*  
464 *gondii*, and *H. sapiens*, respectively.

| Species           | Ten-fold cross-validation | Independent test |
|-------------------|---------------------------|------------------|
| <i>O. sativa</i>  | 0.823                     | 0.818            |
| <i>P. patens</i>  | 0.830                     | 0.831            |
| <i>T. gondii</i>  | 0.862                     | 0.865            |
| <i>H. sapiens</i> | 0.868                     | 0.871            |

465

466

467

468

469 **Table 3.** The AUC values of different CNN<sub>OH</sub> models in terms of independent test for  
470 five distinct organisms.

| Prediction models | Independent data sets |                  |                  |                   |                      |
|-------------------|-----------------------|------------------|------------------|-------------------|----------------------|
|                   | <i>O. sativa</i>      | <i>P. patens</i> | <i>T. gondii</i> | <i>H. sapiens</i> | <i>S. cerevisiae</i> |
| <i>O. sativa</i>  | <b>0.818</b>          | 0.788            | 0.782            | 0.803             | 0.721                |
| <i>P. patens</i>  | 0.761                 | <b>0.831</b>     | 0.812            | 0.837             | <b>0.806</b>         |
| <i>T. gondii</i>  | 0.781                 | 0.813            | <b>0.865</b>     | 0.827             | 0.776                |
| <i>H. sapiens</i> | 0.778                 | 0.818            | 0.832            | <b>0.871</b>      | 0.785                |
| General           | <b>0.802</b>          | <b>0.840</b>     | <b>0.860</b>     | <b>0.868</b>      | <b>0.789</b>         |

471

Note: The top two models with best performance are bold.

472

473

474

475 **Table 4.** The prediction performance of CNN<sub>OH</sub> compared to iLys-Khib in terms of  
476 the same cross-validation and independent test datasets.

| Dataset                   | Model             | Sn    | Sp    | Acc   | MCC   | AUC   |
|---------------------------|-------------------|-------|-------|-------|-------|-------|
| Ten-fold cross-validation | iLys-Khib         | 0.745 | 0.658 | 0.701 | 0.404 | 0.770 |
|                           | CNN <sub>OH</sub> | 0.830 | 0.713 | 0.772 | 0.547 | 0.847 |
| Independent test          | iLys-Khib         | 0.725 | 0.643 | 0.648 | 0.186 | 0.756 |
|                           | CNN <sub>OH</sub> | 0.861 | 0.685 | 0.696 | 0.281 | 0.860 |

477

478

479

480

481

482

483

484

485

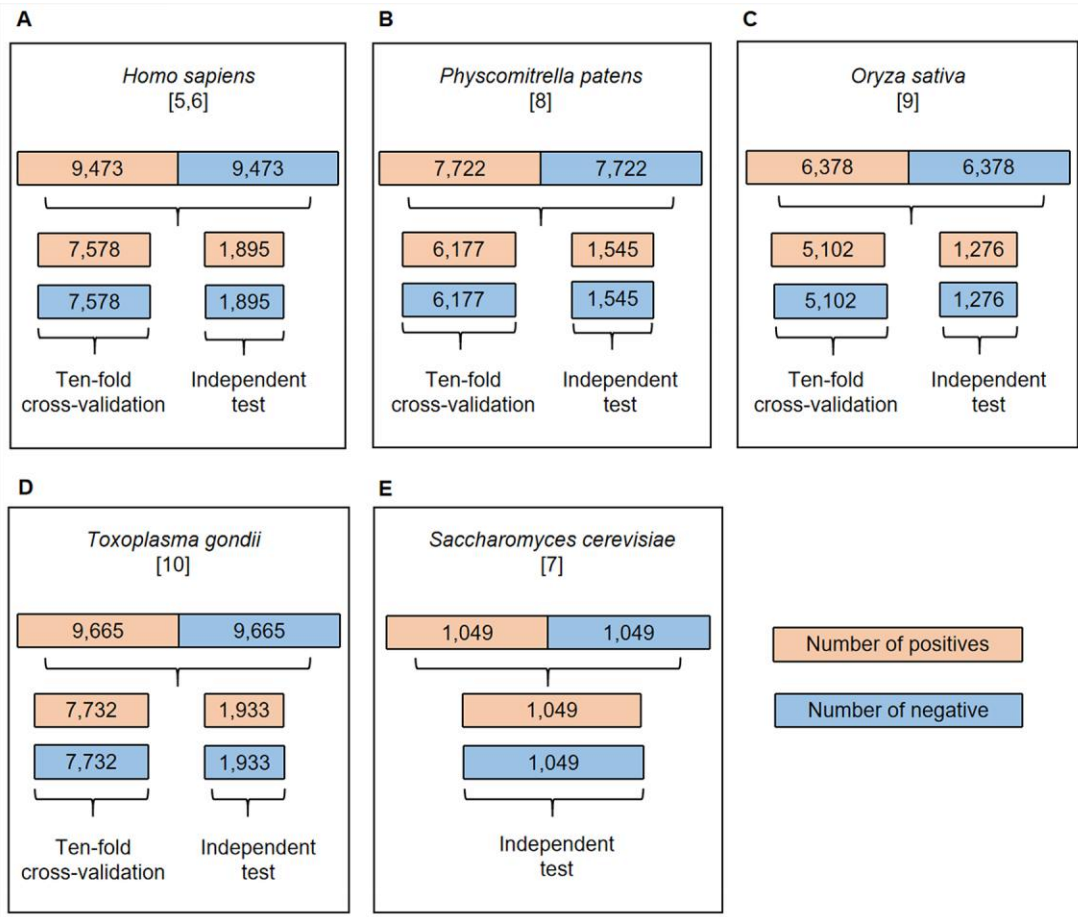

486

487 **Fig 1.** The flowchart of dataset process for *H. sapiens* (A), *P. patens* (B), *O. sativa* (C),  
488 *T. gondii* (D) and *S. cerevisiae* (E). All the datasets were separated into  
489 cross-validation and independent test datasets except the *S. cerevisiae* dataset.

490

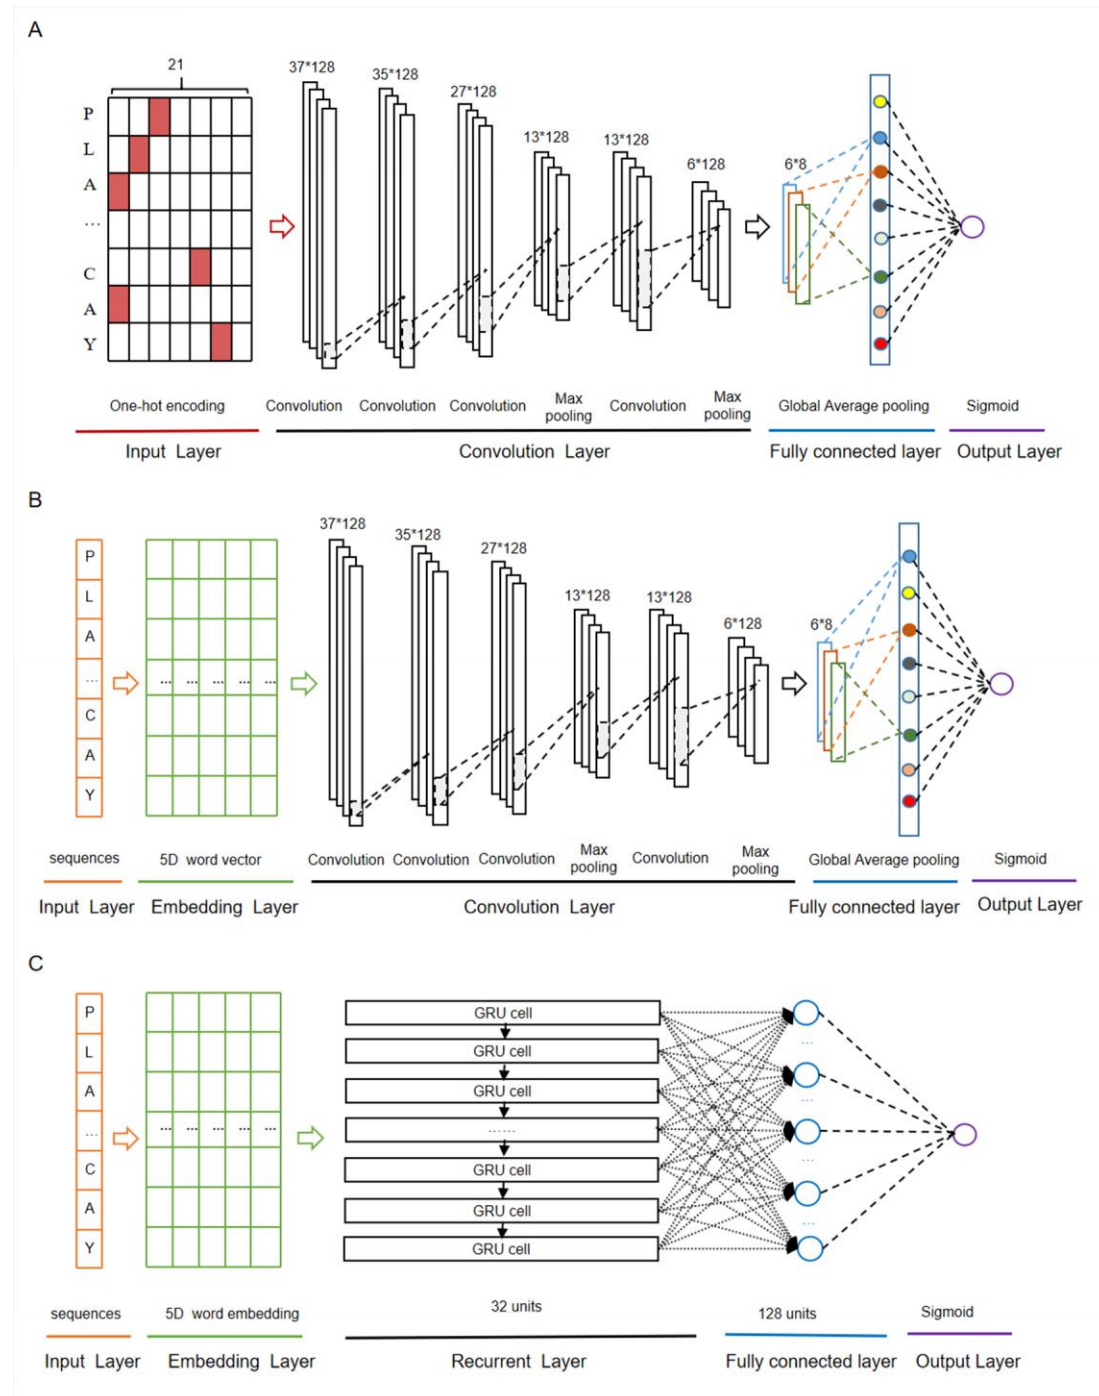

491

492 **Fig 2.** The deep-learning architectures for CNN<sub>OH</sub> (A), CNN<sub>WE</sub> (B) and GRU<sub>WE</sub> (C) .

493

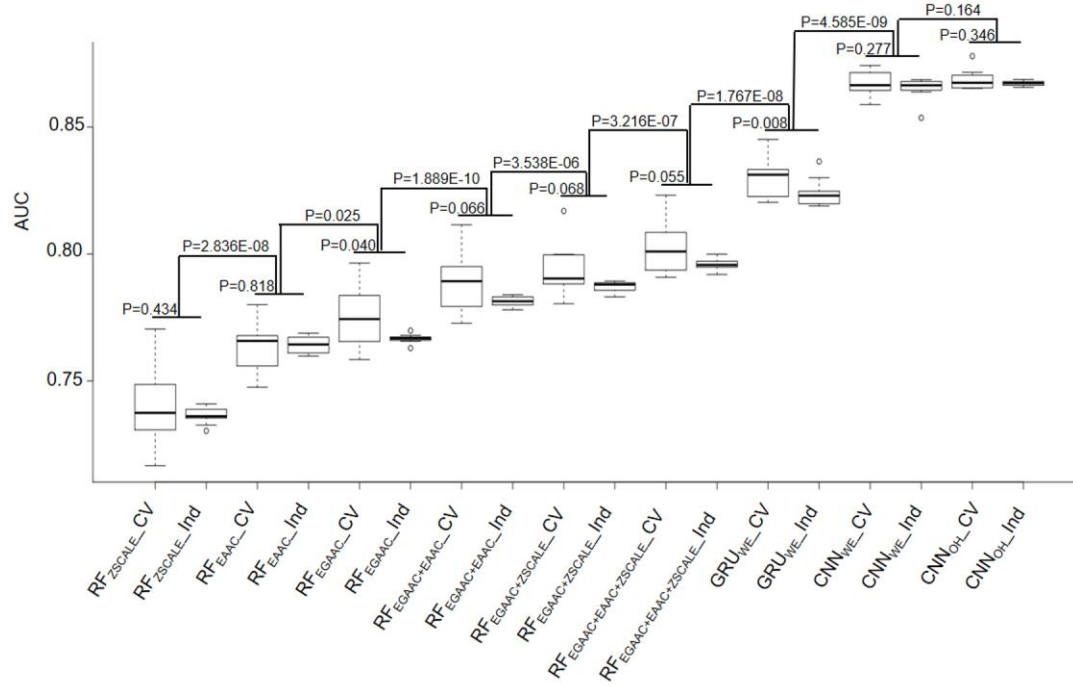

494

495 **Fig 3.** Performance comparison of ten-fold cross-validation and independent test  
496 datasets of nine different models.

497

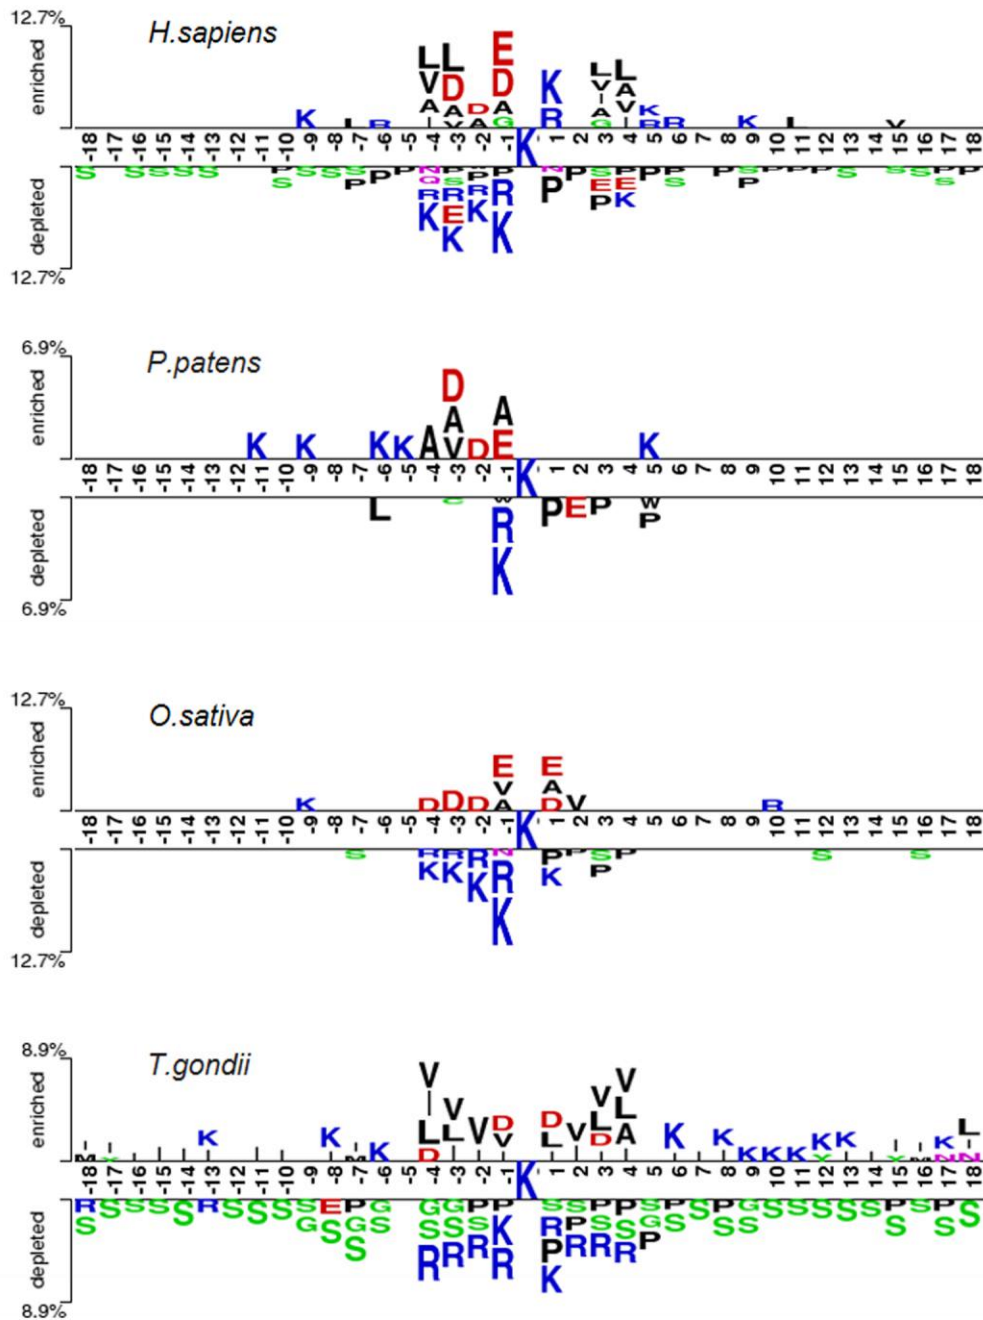

498

499 **Fig 4.** Sequence pattern surrounding the K<sub>hib</sub> sites, including the significantly enriched  
 500 and depleted residues based on K<sub>hib</sub> peptides and non-modification peptides from  
 501 different species ( $P < 0.05$ , student's T-test with Bonferroni correction). The pattern  
 502 was generated using the two-sample-logo method [37].

503



A

[Introduction](#)   [Prediction](#)   [Help](#)   [Download](#)   [Contact Us](#)



## DeepKhib Prediction

Input your protein sequences with FASTA format. (example) :

```
> A0AV96
MTAEDSTAAMSSD5AAGSSAKVPEGVAGAPNEAALLALMERTGYSMVQENGQRKYGGP
PPGWEGPHPQRGCEVFGKIPRDVYEDELVPVFEAVGRIYELRLMDFDGNRGYAFVMI
CHKHEAKRAVRELNNYEIRPGRLLGVCCSVNCRIFGGIPKMKKREEILEEIAKVTEGLDV
IVYASAADKMKNRGFAPVEYESHRAAAMARRKLMFGRIQLWGHQIAVDWAEPEDVDED
VMETVKILYVRNLMIIETTEDTIKKSFGQFNPGCVERVKIRDYAFVHFTSREDAVHAMNNL
```

Or upload a file:  
 No file selected.

Choose a specific species:

Homo sapiens  
 Oryza sativa  
 Physcomitrella patens  
 Toxoplasma gondii  
 General(Homo sapiens,Oryza sativa,Physcomitrella patens and Toxoplasma gondii)

B

## DeepKhib prediction result

Download predictions:

| Protein | Position | Sequence                              | Prediction score | Prediction category  |
|---------|----------|---------------------------------------|------------------|----------------------|
| A0AV96  | 21       | AEDSTAAMSSD5AAGSSAKVPEGVAGAPNEAALLALM | 0.011984         | No                   |
| A0AV96  | 54       | LALMERTGYSMVQENGQRKYGGPPGWEGPHPQRGCE  | 0.240550         | No                   |
| A0AV96  | 77       | PPGWEGPHPQRGCEVFGKIPRDVYEDELVPVFEAVG  | 0.664412         | Very high confidence |
| A0AV96  | 109      | FEAVGRIYELRLMDFDGNRGYAFVMIYCHKHEAKRA  | 0.924083         | Very high confidence |
| A0AV96  | 121      | MDFDGNRGYAFVMIYCHKHEAKRAVRELNNYEIRPG  | 0.491399         | High confidence      |
| A0AV96  | 125      | DGNRGYAFVMIYCHKHEAKRAVRELNNYEIRPGRLLG | 0.084327         | No                   |
| A0AV96  | 160      | LGVCCSVNCRIFGGIPKMKKREEILEEIAKVTEGV   | 0.599747         | High confidence      |
| A0AV96  | 162      | VCCSVNCRIFGGIPKMKKREEILEEIAKVTEGLVD   | 0.044440         | No                   |
| A0AV96  | 163      | CCSVNCRIFGGIPKMKKREEILEEIAKVTEGLVDV   | 0.043233         | No                   |
| A0AV96  | 173      | IGGIPKMKKREEILEEIAKVTEGLDVIYASAADKM   | 0.020177         | No                   |
| A0AV96  | 190      | AKVTEGLDVIYASAADKMKNRGFAPVEYESHRAAA   | 0.597568         | High confidence      |
| A0AV96  | 192      | VTEGLDVIYASAADKMKNRGFAPVEYESHRAAMA    | 0.093939         | No                   |
| A0AV96  | 213      | GFAFVEYESHRAAAMARRKLMFGRIQLWGHQIAVDWA | 0.136066         | No                   |
| A0AV96  | 246      | VDWAPEIDVDEDVMEVKILYVRNLMIIETTEDTIK   | 0.073464         | No                   |
| A0AV96  | 263      | VKILYVRNLMIIETTEDTIKKSFGQFNPGCVERVKIR | 0.908789         | Very high confidence |
| A0AV96  | 264      | KILYVRNLMIIETTEDTIKKSFGQFNPGCVERVKIRD | 0.596560         | High confidence      |
| A0AV96  | 278      | DTIKKSFGQFNPGCVERVKIRDYAFVHFTSREDAVH  | 0.004530         | No                   |
| A0AV96  | 279      | TIKKSFGQFNPGCVERVKIRDYAFVHFTSREDAVHA  | 0.016062         | No                   |

Legend:

| Label                | Score Range     | Specificity |
|----------------------|-----------------|-------------|
| Very high confidence | (0.643 - 1)     | >99%        |
| High confidence      | (0.441 - 0.643) | 95%-99%     |
| Medium confidence    | (0.32 - 0.441)  | 90%-95%     |
| No                   | (0,0.32)        | <90%        |

504

505 **Fig 5.** DeepKhib interface for the prediction of  $K_{hib}$  sites with the option of  
 506 organism-specific or general classifiers (A) and its application to the prediction (B).

507
